# Supplementary material
Source: publisher figshare collection journal article supplement (https://acs.figshare.com/ndownloader/files/4619698)
Supplement: Supplementary file 1 [file 4619698]

## Supporting Information

# Methyl Proton Contacts Obtained Using Heteronuclear Through-Bond Transfers in Solid- State NMR Spectroscopy

*Antoine Loquet<sup>‡</sup>, Ségolène Laage<sup>‡</sup>, Carole Gardiennet<sup>‡</sup>, Bénédicte Elena<sup>‡</sup>, Lyndon Emsley<sup>‡</sup>,  
Anja Böckmann<sup>‡\*</sup> and Anne Lesage<sup>‡\*</sup>.*

<sup>‡</sup> Institut de Biologie et Chimie des Protéines, UMR 5086 CNRS/Université de Lyon, IFR  
128, 7 passage du Vercors, 69367 Lyon, France

<sup>‡</sup> Université de Lyon, CNRS/ ENS Lyon/ UCB-Lyon 1, Centre RMN à Très Hauts Champs, 5  
rue de la Doua, 69100 Villeurbanne, France.

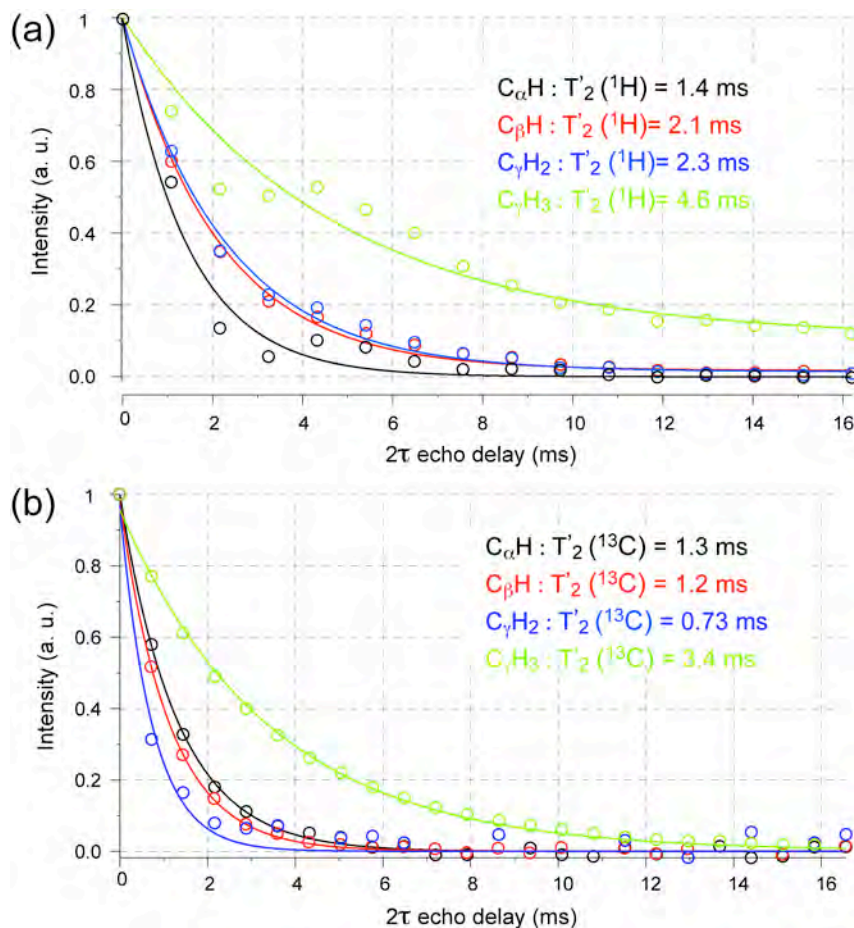

**Figure S1:** Measurement of proton (a) and carbon (b) refocused transverse dephasing time  $T_2'$  under homonuclear decoupling on fully  $^{13}\text{C}$ -labeled L-isoleucine. Proton  $T_2'$  were measured using the following pulse sequence:  $90^\circ$  proton pulse,  $\tau$ - $\pi$ - $\tau$  echo period under eDUMBO-1 homonuclear decoupling, short CP step of  $50 \mu\text{s}$  to transfer the magnetization to the adjacent carbon nuclei, and detection of the  $^{13}\text{C}$  magnetization. Carbon  $T_2'$  were measured using the following pulse sequence:  $90^\circ$  proton pulse, CP to the carbon spins,  $\tau$ - $\pi$ - $\tau$  echo period under eDUMBO-1 homonuclear decoupling, Z-filter (1 ms) and detection of the  $^{13}\text{C}$  magnetization. The  $\pi$  pulse employed was a selective Q3 refocusing pulse of 2.3 ms. In both measurements the  $\tau$  delays were incremented by multiples of the rotor period and 16 transients were used for each value of  $\tau$ . The spinning frequency was 22 kHz and eDUMBO-1 decoupling was applied at a RF field strength of 150 kHz. The carbon peak intensities were then fitted to a single exponential decay function.

| Seg | Res | aa  | Atom | Seg | Res | aa  | Atom |
|-----|-----|-----|------|-----|-----|-----|------|
| a   | 16  | ALA | HB   | a   | 51  | MET | HE   |
| a   | 19  | ALA | HB   | a   | 47  | ILE | HD1  |
| a   | 44  | ALA | HB   | a   | 26  | ALA | HB   |
| a   | 33  | VAL | HG   | a   | 44  | ALA | HB   |
| a   | 57  | THR | HG   | a   | 12  | THR | HG   |
| a   | 77  | LEU | HD   | a   | 26  | ALA | HB   |
| a   | 63  | LEU | HD   | a   | 77  | LEU | HD   |
| a   | 81  | VAL | HG   | a   | 35  | LEU | HD   |
| a   | 55  | VAL | HG   | a   | 14  | LEU | HD   |
| a   | 23  | VAL | HG   | a   | 47  | ILE | HG2  |
| a   | 26  | ALA | HB   | a   | 33  | VAL | HG   |
| a   | 33  | VAL | HG   | a   | 63  | LEU | HD   |
| a   | 42  | VAL | HG   | a   | 35  | LEU | HD   |
| a   | 61  | VAL | HG   | a   | 35  | LEU | HD   |
| a   | 44  | ALA | HB   | a   | 35  | LEU | HD   |
| a   | 61  | VAL | HG   | a   | 81  | VAL | HG   |
| a   | 44  | ALA | HB   | a   | 63  | LEU | HD   |
| a   | 44  | ALA | HB   | a   | 77  | LEU | HD   |
| a   | 47  | ILE | HD1  | a   | 20  | ALA | HB   |
| a   | 47  | ILE | HD1  | a   | 23  | VAL | HG   |
| a   | 51  | MET | HE   | a   | 19  | ALA | HB   |
| a   | 73  | ALA | HB   | a   | 33  | VAL | HG   |
| a   | 64  | ILE | HD1  | a   | 62  | THR | HG   |
| a   | 54  | ALA | HB   | a   | 55  | VAL | HG   |

|   |    |     |    |    |    |     |    |
|---|----|-----|----|----|----|-----|----|
| a | 19 | ALA | HB | a  | 14 | LEU | HD |
| a | 78 | ALA | HB | a  | 74 | LEU | HD |
| a | 20 | ALA | HB | a  | 16 | ALA | HB |
| a | 21 | LEU | HD | a  | 20 | ALA | HB |
| a | 12 | THR | HG | b* | 55 | VAL | HG |
| a | 74 | LEU | HD | b* | 2  | VAL | HG |
| a | 35 | LEU | HD | b* | 6  | VAL | HG |
| a | 2  | VAL | HG | b* | 74 | LEU | HG |
| a | 78 | ALA | HB | b* | 6  | VAL | HG |
| a | 14 | LEU | HD | b* | 12 | THR | HG |

**Figure S2:** Distance restraints identified from the 2D J-CHHC spectrum of the [U-<sup>13</sup>C/<sup>15</sup>N] labeled Crh protein. \* These restraints involve proton contacts between the two monomers (segment a and b) of the dimeric Crh.
